# Supplementary material
Source: PubMed Central journal article supplement (PMC4854490)

**Supplementary Figure 1** Goodness of fit plots for the efavirenz pharmacokinetic model (n=606 patients) illustrating (a) population predictions of efavirenz vs. observed concentrations and (b) individual predictions of efavirenz vs. observed concentrations for the base model, (c) population predictions vs. observed concentrations and (d) individual predictions vs. observed concentrations for the final model. The fine line describes the line of unity and the bold line describes the line of regression.

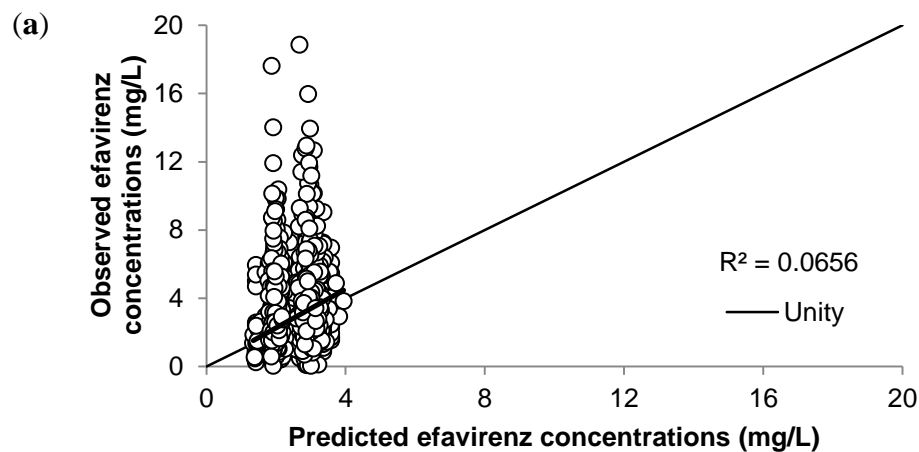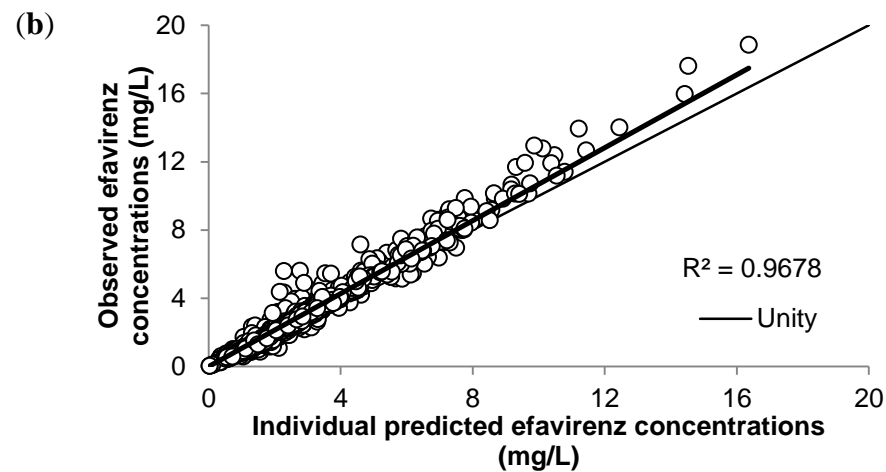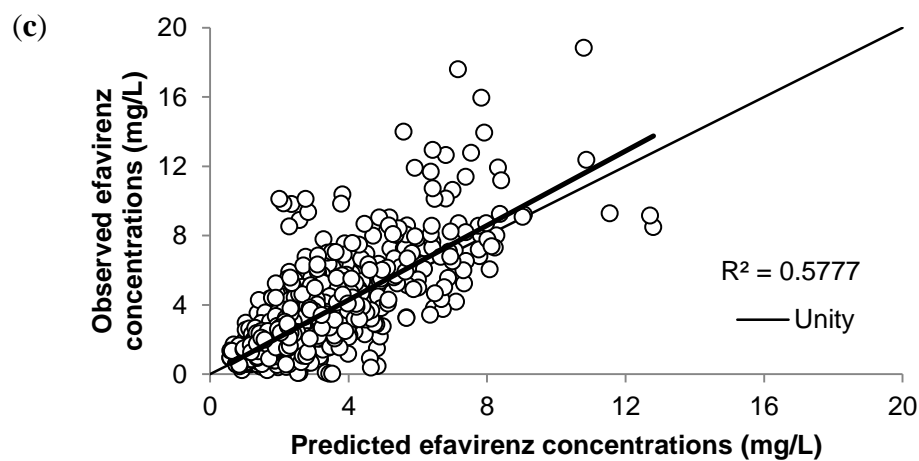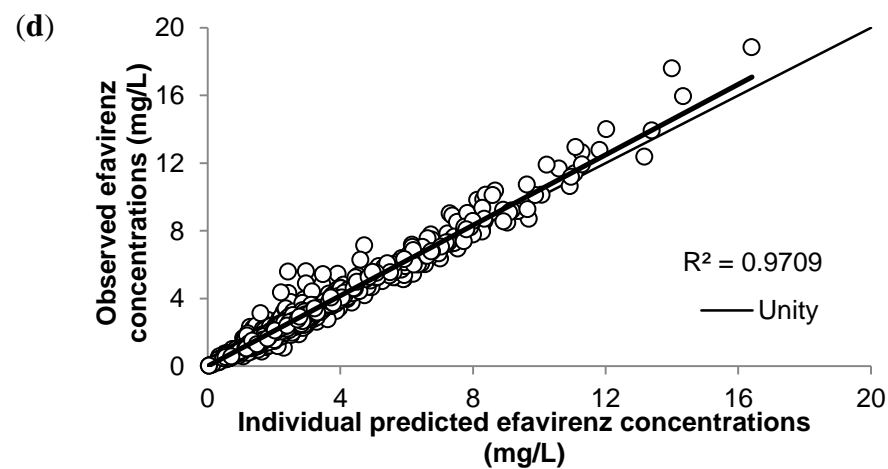

Supplement: CPT-98-406-s006.pdf [file CPT-98-406-s006.pdf]
