# Supplementary material
Source: PubMed Central journal article supplement (PMC4854490)

**Supplementary Figure 2** Efavirenz ninety percent prediction interval (P5-P95) for (a) efavirenz 400mg once daily and (b) 600mg once daily. *CYP2B6* 516G>T/983T>C/*CYP2A6*\*9B/\*17 and missing genotypes are illustrated. Observed data were superimposed (400mg: n=794 concentrations, n=310 patients; 600mg: n=694 concentrations; n=295 patients).

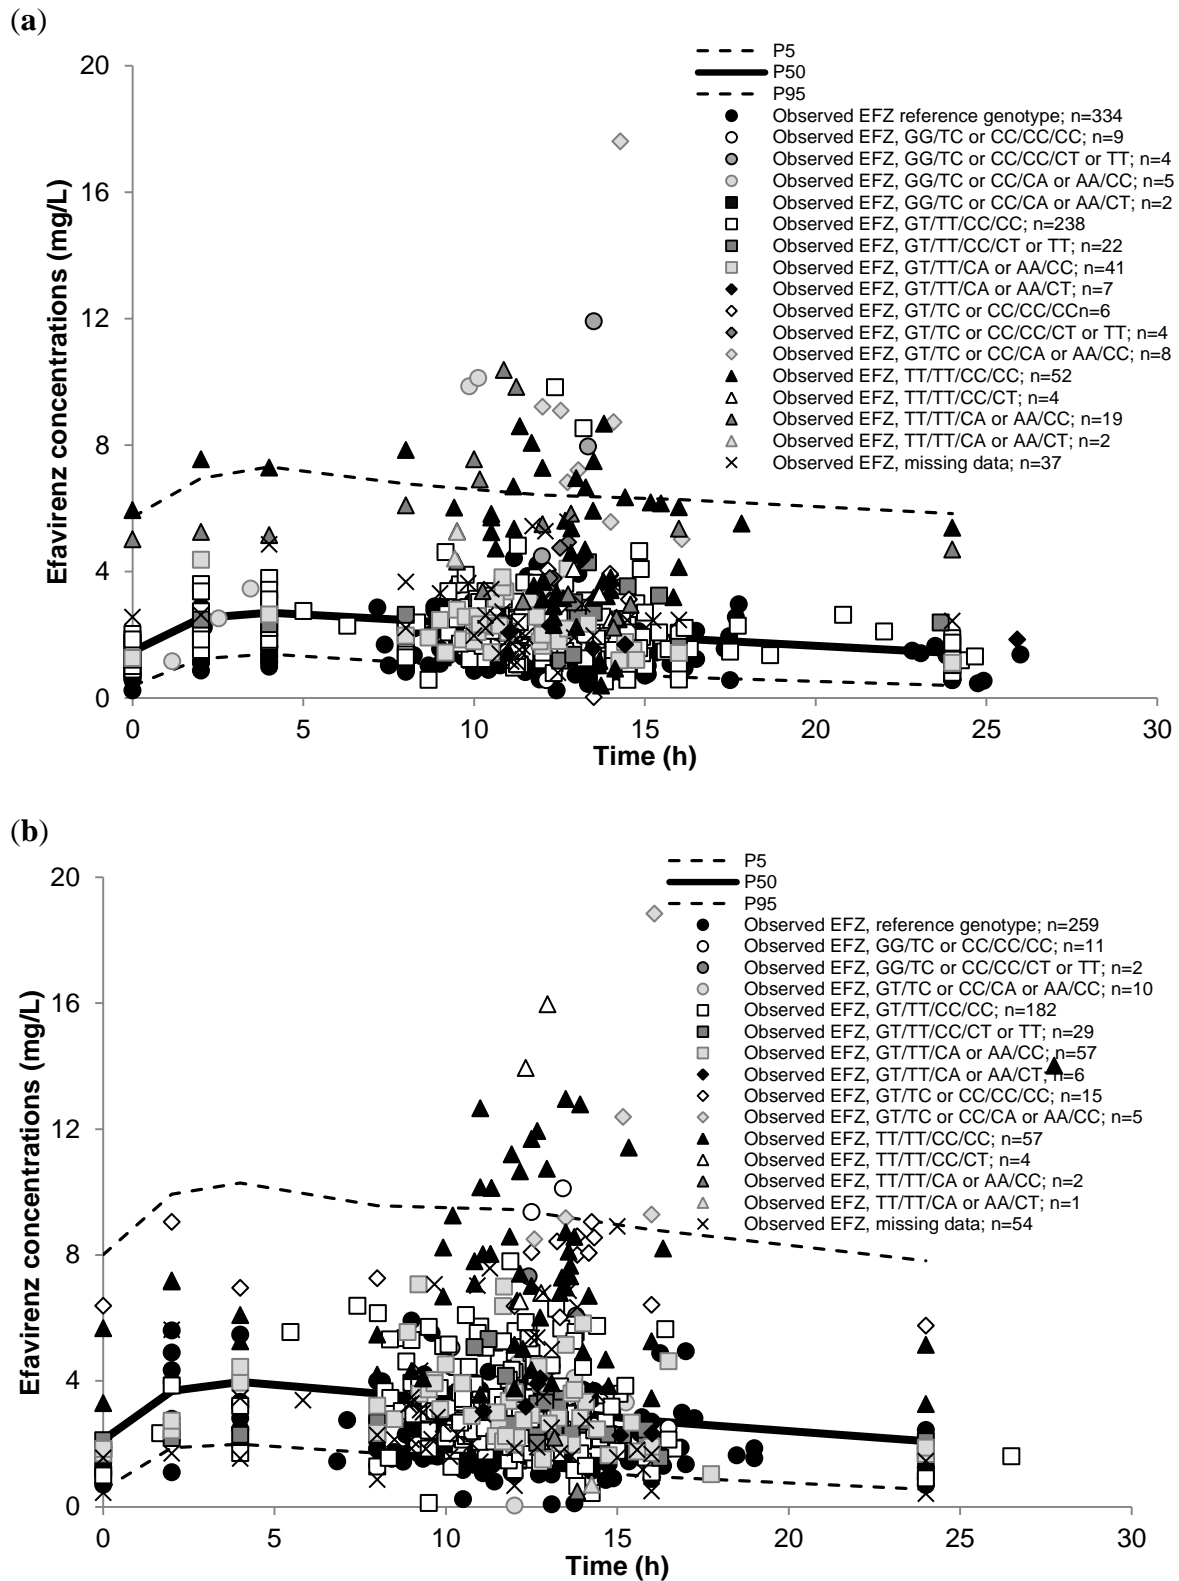

Supplement: CPT-98-406-s007.pdf [file CPT-98-406-s007.pdf]
