# Supplementary material
Source: PubMed Central journal article supplement (PMC4854490)
Supplement: CPT-98-406-s008.pdf [file CPT-98-406-s008.pdf]

**Supplementary Figure 3** Mean individual predicted efavirenz  $C_{\min}$  ( $C_{24}$ ) from the ENCORE1 study dosed (a) 400mg and (b) 600mg once daily stratified by *CYP2B6* 15582C>T/516G>T/983T>C genotype. Each point is an individual patient; the solid black line represents the median concentration and the dashed line the recommended minimum effective concentration for efavirenz (1.0 mg/L). Numbers of patients with detectable or missing viral load at 48 weeks are shown.

(a)

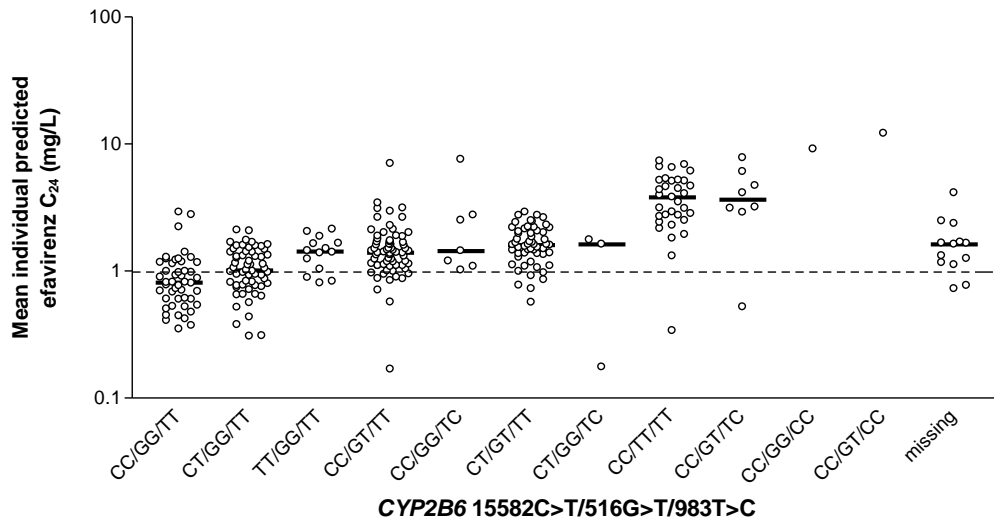

VL $\geq$ 200copies/ mL  
Missing VL

|   |   |   |   |   |   |   |   |   |   |   |   |   |
|---|---|---|---|---|---|---|---|---|---|---|---|---|
| 0 | 1 | 0 | 2 | 0 | 4 | 0 | 2 | 0 | 0 | 0 | 0 | 0 |
| 2 | 0 | 0 | 1 | 1 | 1 | 0 | 1 | 0 | 0 | 0 | 0 | 0 |

(b)

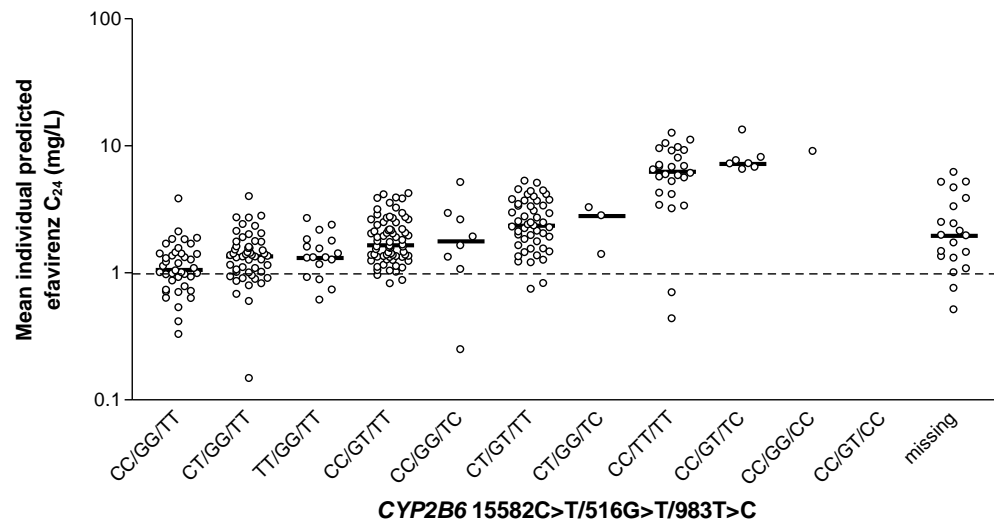

VL $\geq$ 200copies/mL  
Missing VL

|   |   |   |   |   |   |   |   |   |   |     |   |
|---|---|---|---|---|---|---|---|---|---|-----|---|
| 0 | 2 | 0 | 1 | 1 | 1 | 0 | 1 | 0 | 0 | n/a | 1 |
| 0 | 1 | 1 | 0 | 0 | 0 | 0 | 2 | 1 | 0 | n/a | 2 |

$C_{24}$ : concentration 24 hours post-dose; VL: viral load
